# Supplementary material for: Long-term ocular and visual outcomes following symptomatic and asymptomatic congenital CMV infection: a systematic review protocol
Source: HighWire-hosted journal article supplement (doi:10.1136/bmjopen-2021-059038), 2022-05-01
Supplement: bmjopen-2021-059038supp001_data_supplement.pdf [file bmjopen-2021-059038supp001_data_supplement.pdf]

### Embase

#### Search Strategy:

1. Human cytomegalovirus/ or Cytomegalovirus antibody/ or Cytomegalovirus/
2. cytomegalovirus.tw.
3. CMV.tw.
4. 1 or 2 or 3
5. congenital
6. 4 and 5
7. 6 not ((exp animal/ or nonhuman/) not exp human/)

### Medline

#### Search Strategy:

1. exp Cytomegalovirus/
2. cmv.mp. [mp=title, abstract, original title, name of substance word, subject heading word, keyword heading word, protocol supplementary concept word, rare disease supplementary concept word, unique identifier]
3. cytomegalovirus\*.mp. [mp=title, abstract, original title, name of substance word, subject heading word, keyword heading word, protocol supplementary concept word, rare disease supplementary concept word, unique identifier]
4. 1 or 2 or 3
5. congenital.mp. [mp=title, abstract, original title, name of substance word, subject heading word, keyword heading word, protocol supplementary concept word, rare disease supplementary concept word, unique identifier]
6. 4 and 5
7. limit 15 to human

### Cochrane Database

#### Search Strategy:

1. cytomegalovirus:ab,ti
2. congenital:ab,ti

3. #1 AND #2

### CINAHL Plus

#### Search Strategy:

1. (MH "Cytomegalovirus Infections") OR "cmv"
2. "cytomegalovirus" OR (MH "Cytomegalovirus Infections")
3. hcmv
4. S1 OR S2 OR S3
5. (MH "Congenital") OR "congenital"
6. S4 and S5
